# Supplementary material for: Compositionally driven relaxor to ferroelectric crossover in (1 − x)Na0.5Bi0.5TiO3–xBiFeO3 (0 ≤ x ≤ 0.60)
Source: Royal Society of Chemistry journal article supplement (doi:10.1039/d0tc01096k), 2020-01-01
Supplement: d0tc01096k1.pdf [file d0tc01096k1.pdf]

## Supplementary information

The phase evolution of NBT-100xBFO ceramics is shown in Fig.S1. XRD patterns of unpoled samples indicate that all the compositions exhibit a single-phase perovskite structure.

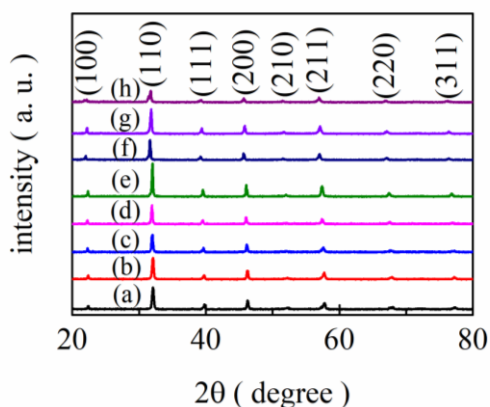

Fig. S1 XRD patterns of unpoled NBT-100xBFO: (a)  $x=0$ , (b)  $x=0.05$ , (c)  $x=0.1$ , (d)  $x=0.2$ , (e)  $x=0.3$ , (f)  $x=0.4$ , (g)  $x=0.5$  and (h)  $x=0.6$ . The XRD data were obtained from crushed and annealed powders (annealing at 500 °C for 30 min).

Fig.S2 depicts SEM images obtained from the polished and thermally-etched surface of NBT-100xBFO ceramics. All the samples demonstrate dense surface morphology.

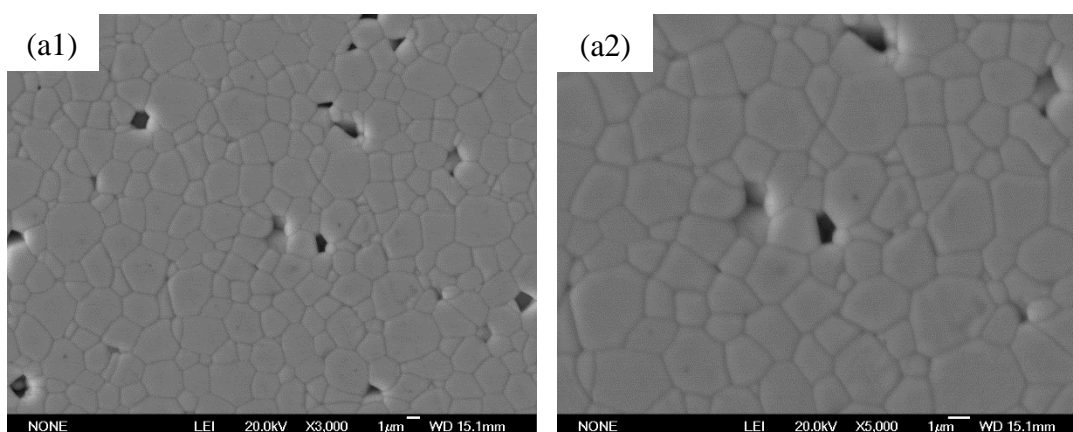

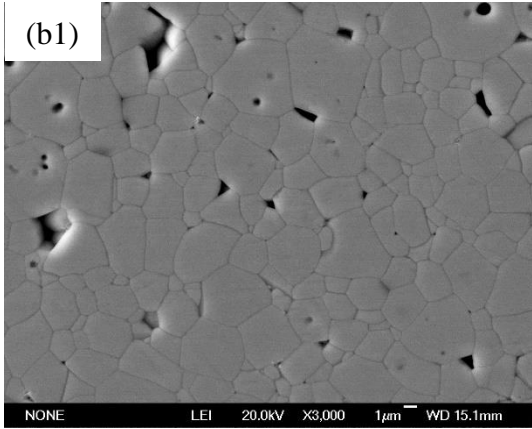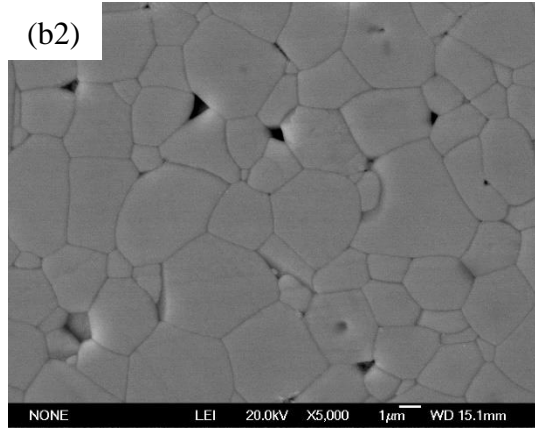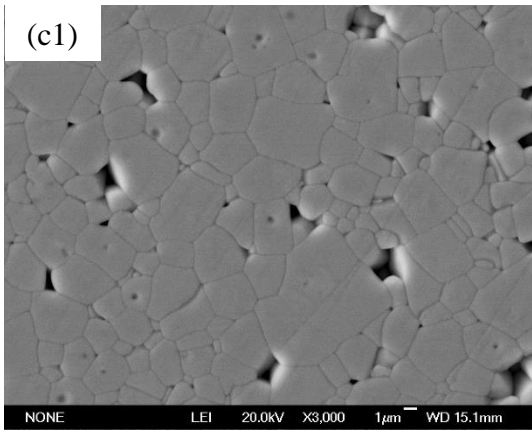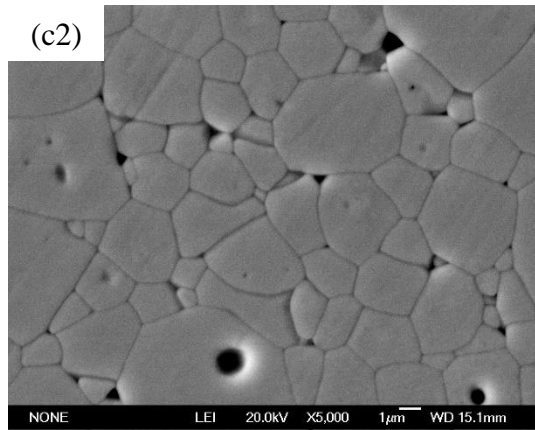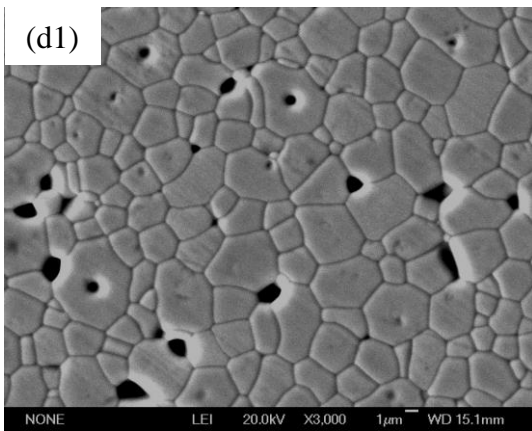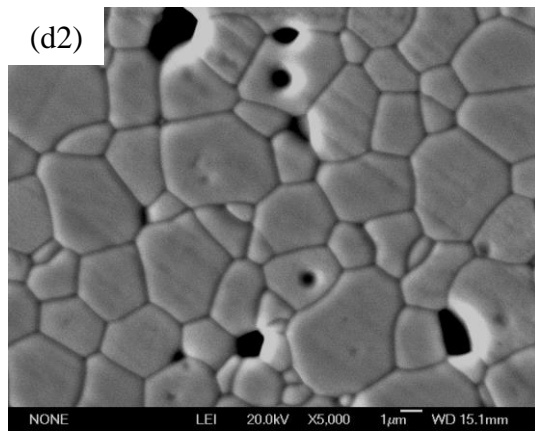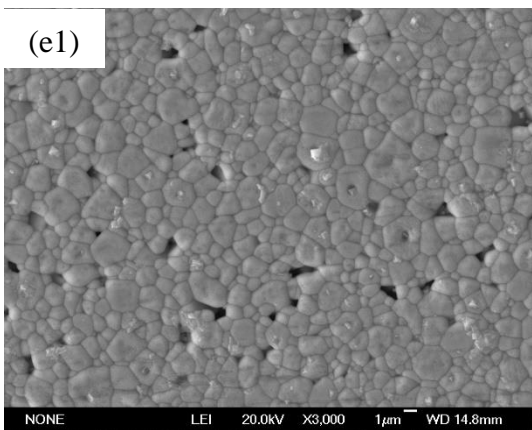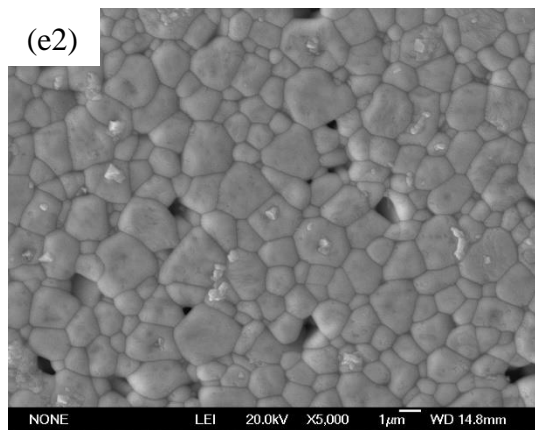

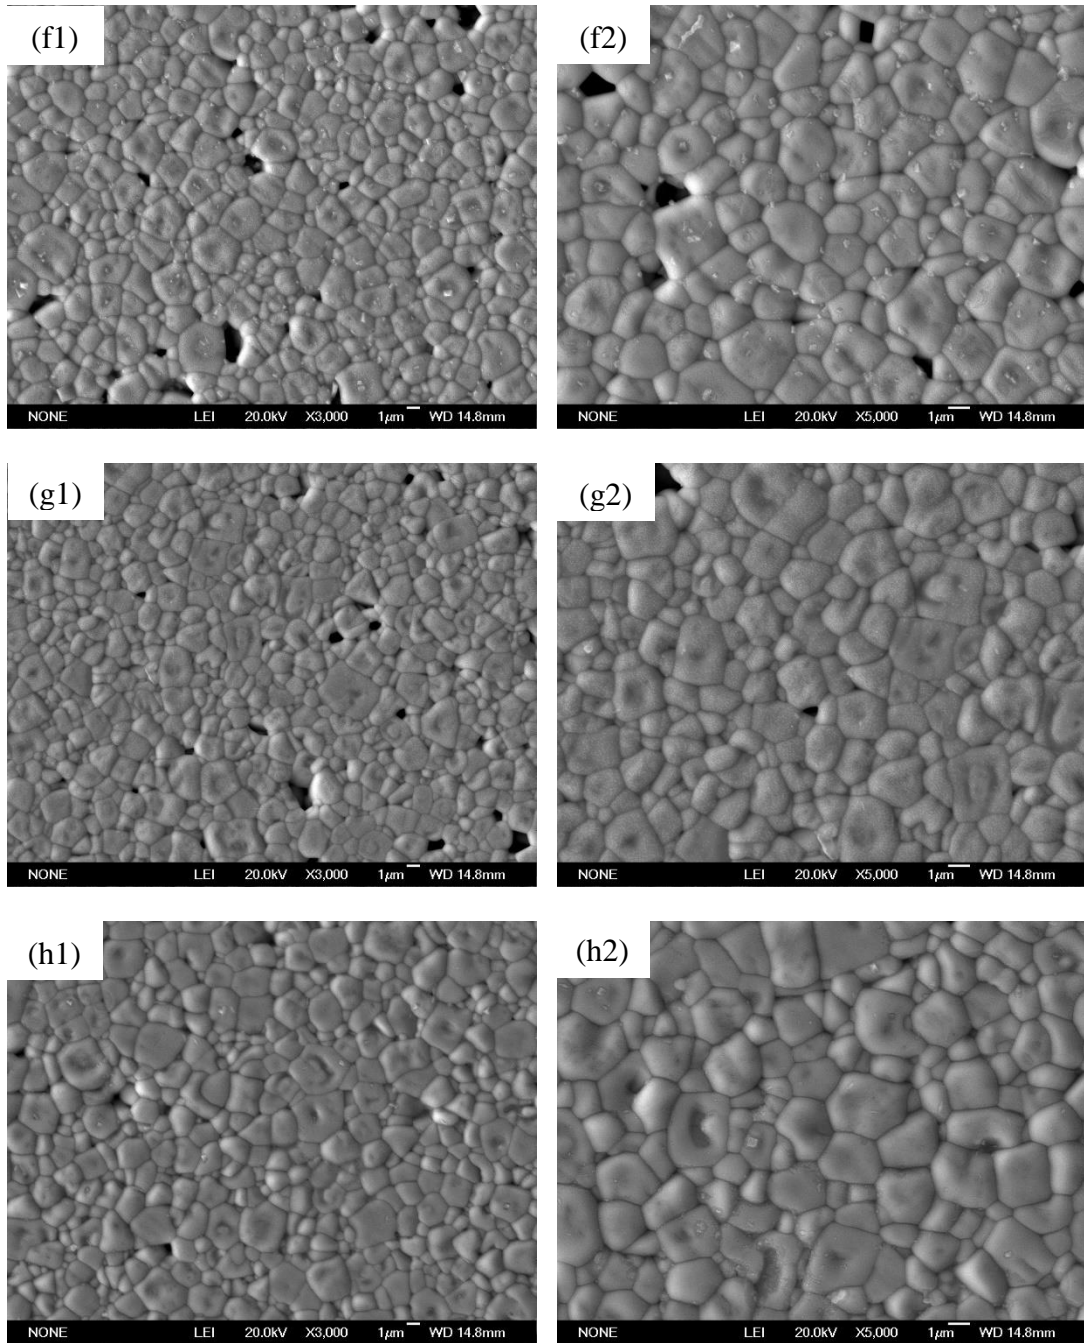

Fig. S2 SEM images of (a1, a2) NBT, (b1, b2) NBT-5BFO, (c1, c2) NBT-10BFO, (d1, d2) NBT-20BFO, (e1, e2) NBT-30BFO, (f1, f2) NBT-40BFO, (g1, g2) NBT-50BFO and (h1, h2) NBT-60BFO.

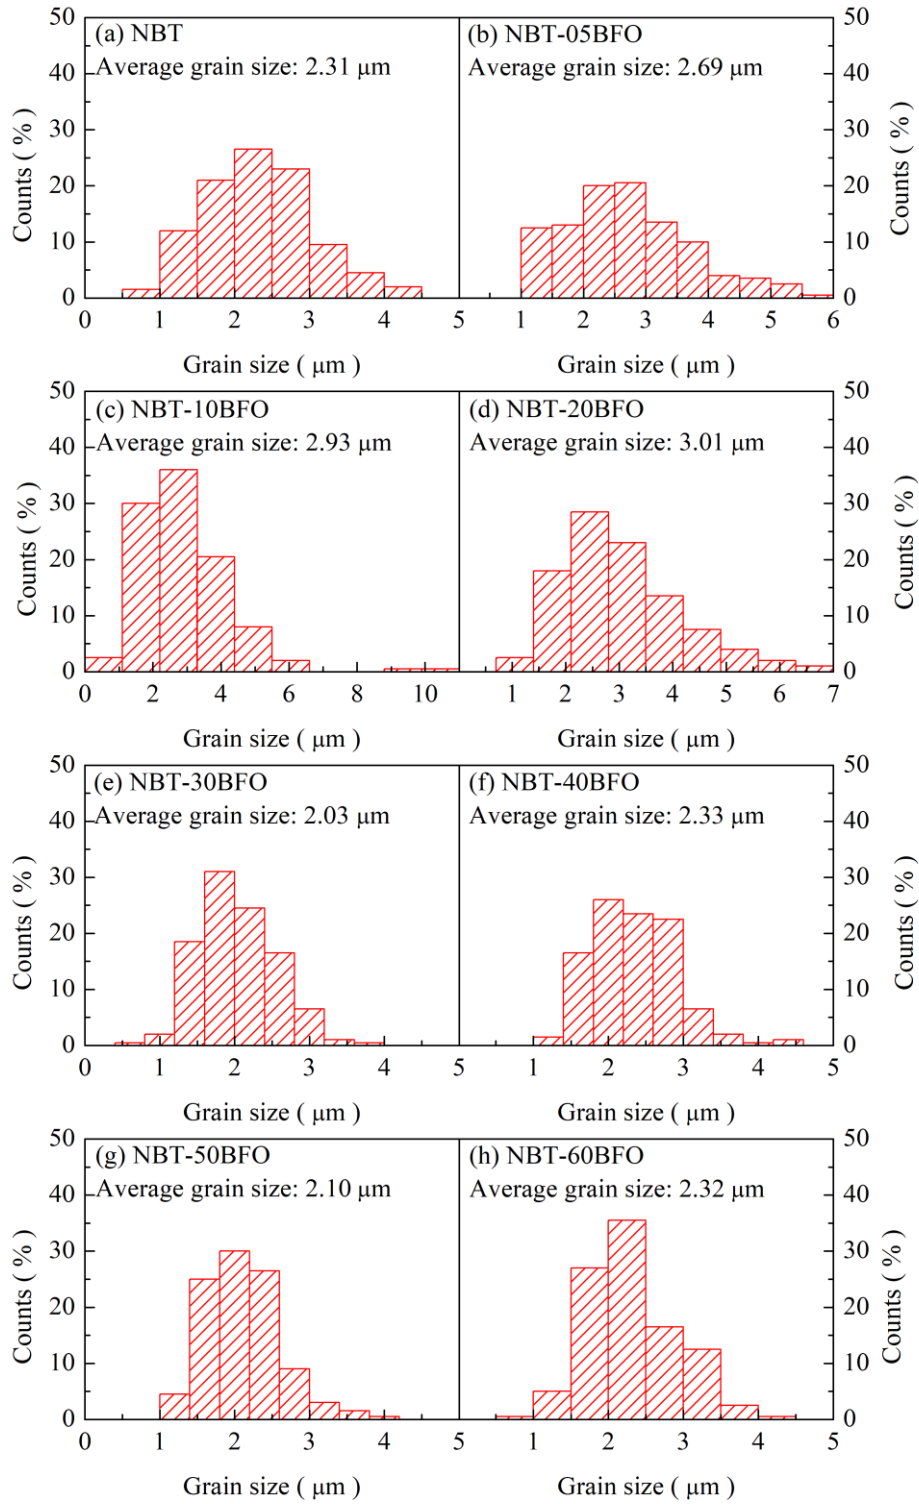

Fig. S3 Grain size distribution of (a) NBT, (a) NBT-5BFO, (c) NBT-10BFO, (d) NBT-20BFO, (e) NBT-30BFO, (f) NBT-40BFO, (g) NBT-50BFO and (h) NBT-60BFO.

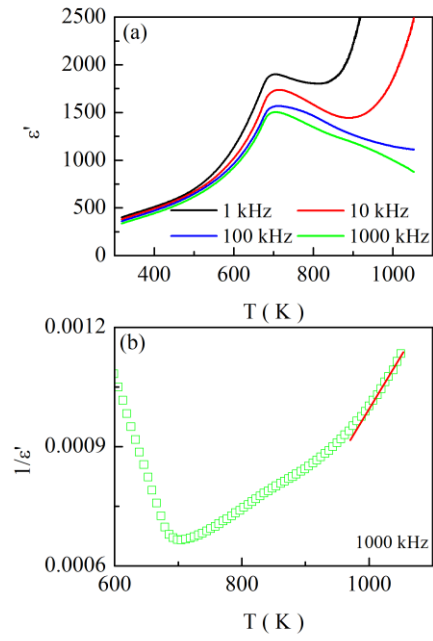

Fig. S4 (a) Temperature dependent  $\epsilon'$  of unpoled NBT-50BFO at different frequencies, (b)  $1/\epsilon'$  as a function of temperature. The solid line is the fitting line from the Curie-Weiss law.

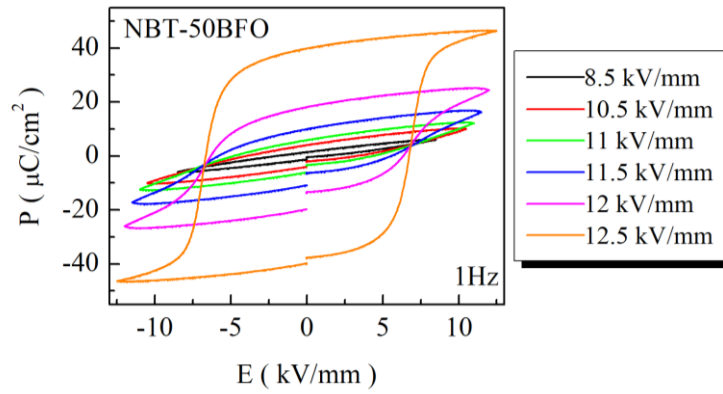

Fig. S5 P-E loops of NBT-50BFO under different electric fields at 1 Hz.

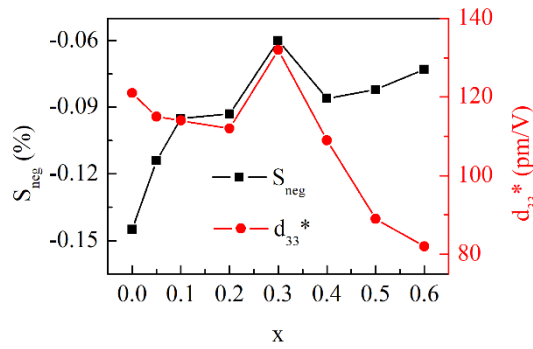

Fig. S6  $S_{neg}$  and  $d_{33}^*$  of NBT-100xBFO.  $d_{33}^*$  is calculated by dividing  $S_{max}$  with  $E_{max}$  in Fig. 4.

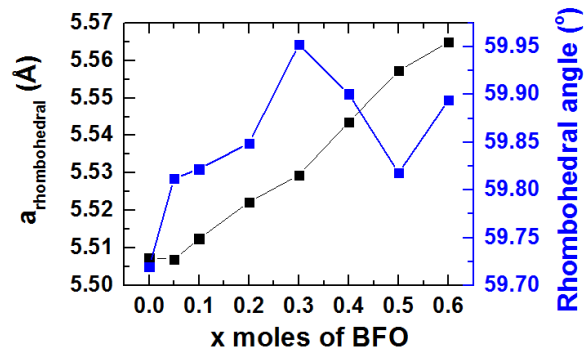

Fig. S7 Rhombohedral lattice parameters obtained from the transformation of the hexagonal setting of  $R3c$
